# Supplementary material for: Phytoglobin Expression Alters the Na+/K+ Balance and Antioxidant Responses in Soybean Plants Exposed to Na2SO4
Source: MDPI journal article supplement (doi:10.3390/ijms23084072), 2022-04-07
Supplement: s1 [file s1]

Table S1. Primers used for qRT-PCR analysis

| Gene              | Forward primer        | Reverse primer         |
|-------------------|-----------------------|------------------------|
| <i>GmPgb1</i>     | AGTTCAGCTGCGGAAGGCCG  | TGCTCGTTTGCTACGCCGGT   |
| <i>GmRBOHB</i>    | GGAAGGAGATGCTCGATCTGC | GTCTTCACCCTTGTCCTGAAAC |
| <i>GmRBOHD</i>    | CTATACGGATGCGAAAGGC   | CAGTGCTAGAACATTTCTGGG  |
| <i>GmRBOHG</i>    | GAACACTCGGAGACTGGAGC  | GGACATCCCTGTGATCGTG    |
| <i>GmSOD1</i>     | ACCAATGGTTGCCTCTCAAC  | CGCCCTTCCTATGATGTTGT   |
| <i>GmSOD3</i>     | TTCCCAAGCTTCTTCACAGG  | TTCACCCAGTGCATATCAA    |
| <i>GmCAT1</i>     | AAGTGTGCCCATCACAACAA  | TCATGCACTTTTCACGCTTC   |
| <i>GmCAT2</i>     | TGCAGAAAGGTTCCCCATAC  | GAGAACGGTCAGCCTGAGAC   |
| <i>GmAPX1</i>     | TTTGAGCTACGCCGATTTCT  | TGACCCCAAGATAGAGCAAC   |
| <i>GmMDHAR1</i>   | TGCCCCGAGATATGAAGAAC  | CCGAAACTGACCATCAACCT   |
| <i>GmMDHAR4</i>   | TGGTGGGAATTGGAATACG   | TGCTTTGACTGGAAATGCTG   |
| <i>GmDHAR1</i>    | GAGATTGCTTTGGGGCATT   | TTCCACTTTAGGACGCCAAC   |
| <i>GmGR1</i>      | TTCCAATATCTCGCCCTCCT  | ACGGGGTCGGCGCCGTTTTG   |
| <i>GmGR2</i>      | TTCTCTATCTCGTCCCTCCC  | GCGGCATCGCGGCCGTTTTG   |
| <i>GmSOS1</i>     | CACCTGGAGCTGTAGGAATG  | CCTCTGAGCAGTGAAATAAG   |
| <i>GmAKT1</i>     | CCCTTTCCATAACCGATAACA | CGGTCATCCACGATCAAATA   |
| <i>GPP</i>        | TCTGCTGAGGAGGCTATGGT  | ATCCCGATCCACCTTTCTCT   |
| <i>GDH1</i>       | CCGAGGAATTCGTACGTTGT  | CTAAGGAGCCGAACCTCGATG  |
| <i>GDH2</i>       | CATCGAGTTGCGCTCCTTAG  | CAACCCCTTTGGTCTTCAA    |
| <i>PsaA</i>       | AGCAACTCCCTTTTTCACC   | GACCCGCTATCAAGAAAAGAAT |
| <i>PsaB</i>       | TGGTGTTTATCAGTGGTGGT  | TGATGATTGAGGCGGGATT    |
| <i>LHCA</i>       | ACCCATGGCACAACAACA    | ACAGCACAGCGATACCAAC    |
| <i>CytB6F</i>     | CGTCCCTCTGTTGTCATGT   | GGAGAGGTGATGGTGAAAAGTT |
| <i>PsbA</i>       | GCAAACCTATAGCCGCAGA   | GGATGGTTTGGTGTTTTGATGA |
| <i>PsbB</i>       | CCCTCTGACCCTGTTCTT    | ATATTCCAACCGCCCCAC     |
| <i>PsbC</i>       | CCTAGTAGTTTGCCGGAT    | CACGTGGAAACGCTCTTTA    |
| <i>PsbD</i>       | AACGAAGTCATAGGCACG    | CTTTGGGGTTGCTTTTCC     |
| <i>GmHelicase</i> | TAACCCTAGCCCCTTCGCCT  | GCCTTGTCGTCTTCCTCCTCG  |
|                   |                       |                        |
|                   |                       |                        |
|                   |                       |                        |
|                   |                       |                        |
|                   |                       |                        |
